# Supplementary material
Source: PubMed Central journal article supplement (PMC11214689)

**Figure S8: Correlation plots for the predicted bioactivity using the OPERA and Saagar descriptors.** Each plot represents a cell-specific phenotype and reports the observed in relation to the cross-validation predictions and the corresponding correlation coefficients.

$\log_{10}(\text{lambdamin})=3.6$

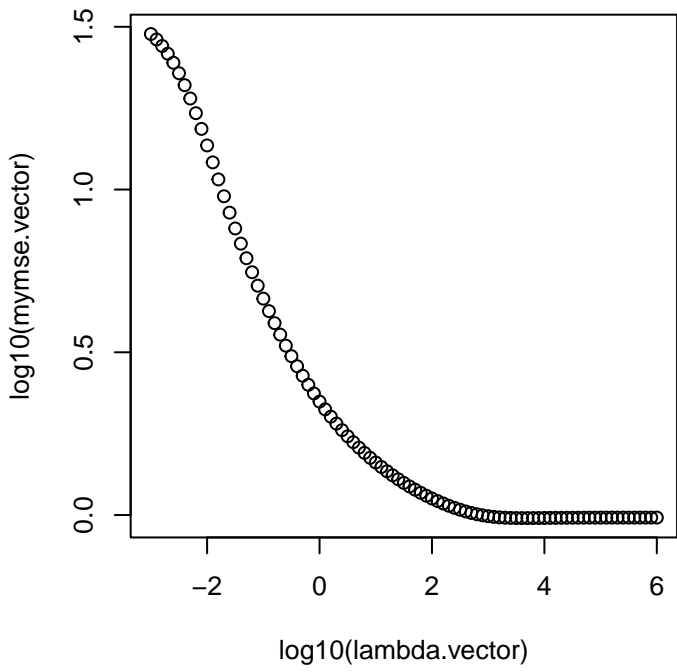

### CARDIO\_90min\_qtprolongation

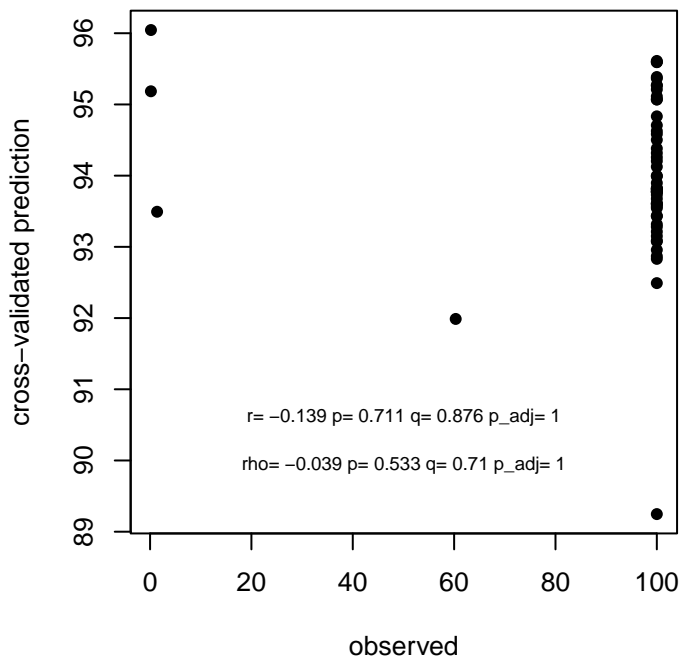

### CARDIO\_90min\_totalcells

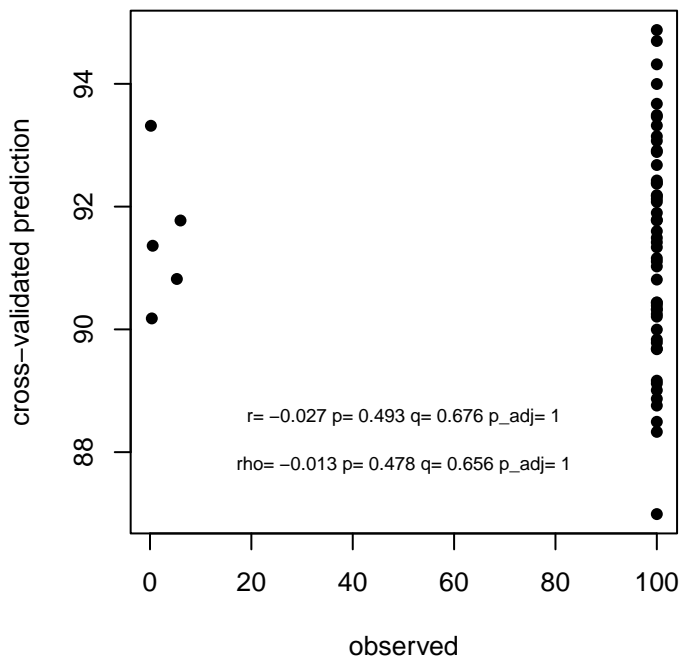

### CARDIO\_90min\_positivechronotrope

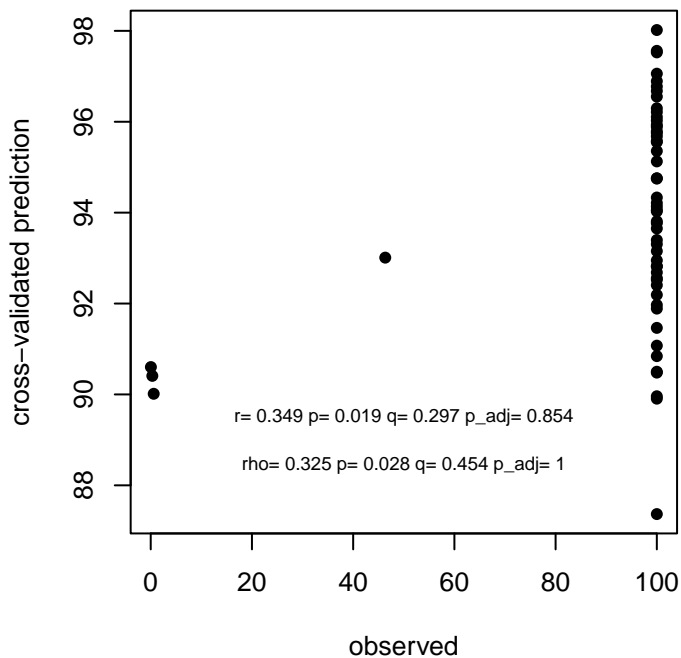

### CARDIO\_90min\_negativechronotrope

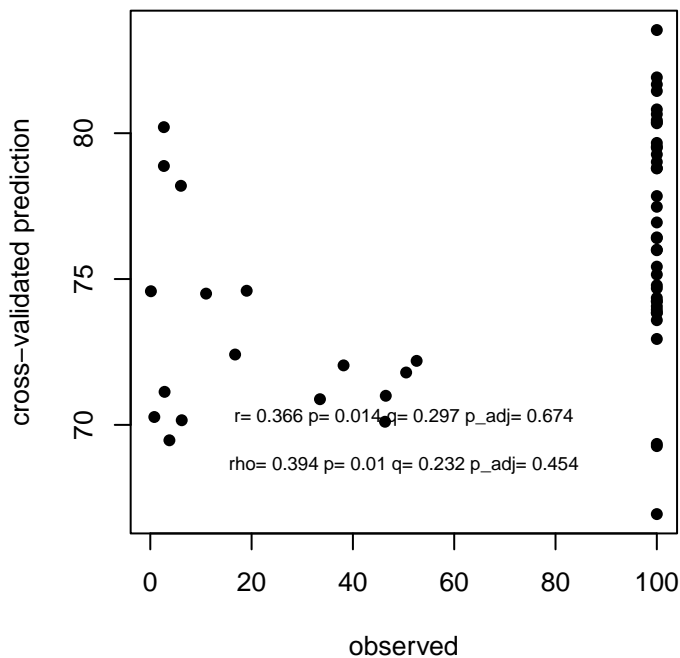

### HUVEC\_48hr\_meantubelength

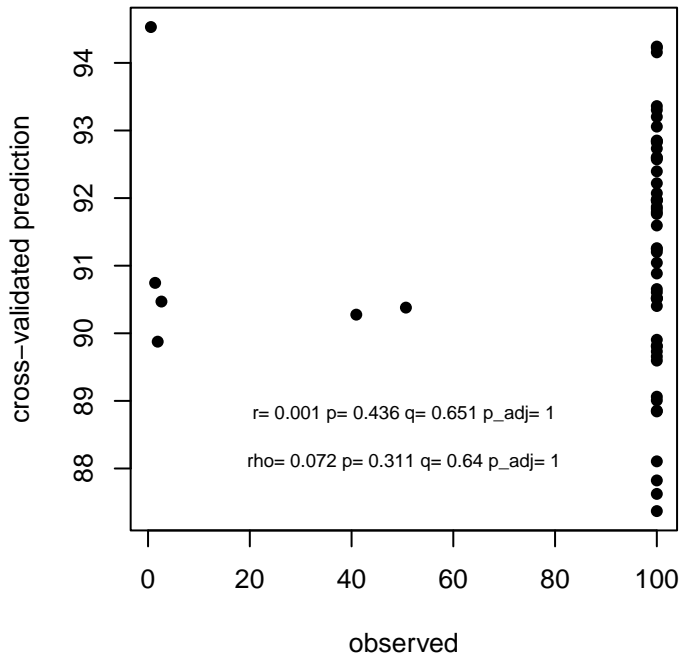

### HUVEC\_48hr\_totaltubelength

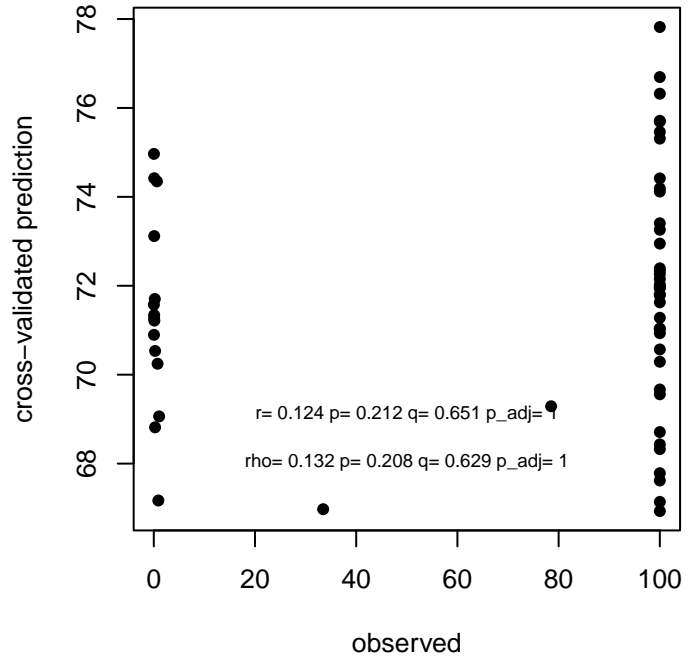

### HUVEC\_48hr\_totaltubearea

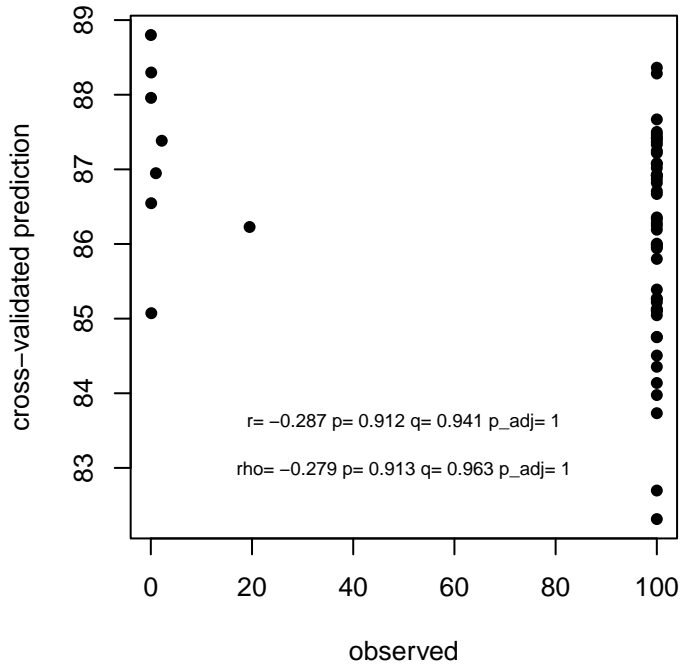

### HUVEC\_48hr\_atpproduction

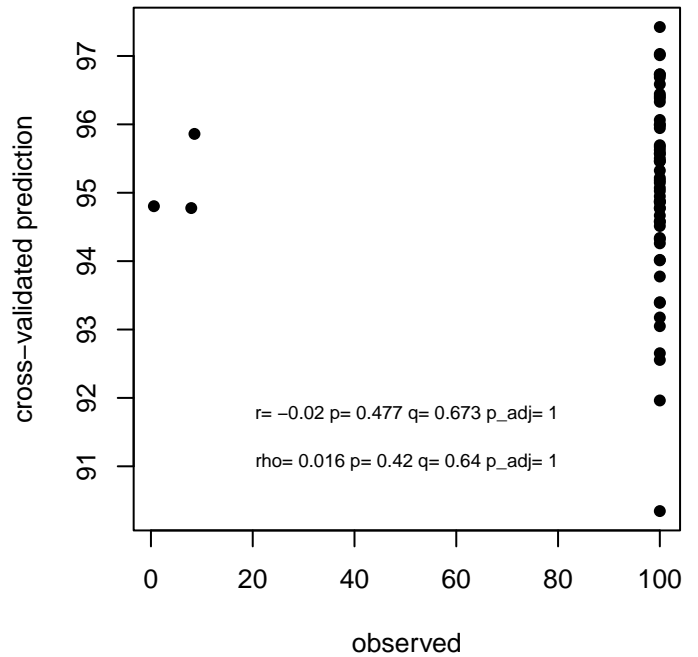

### HUVEC\_48hr\_totalcells

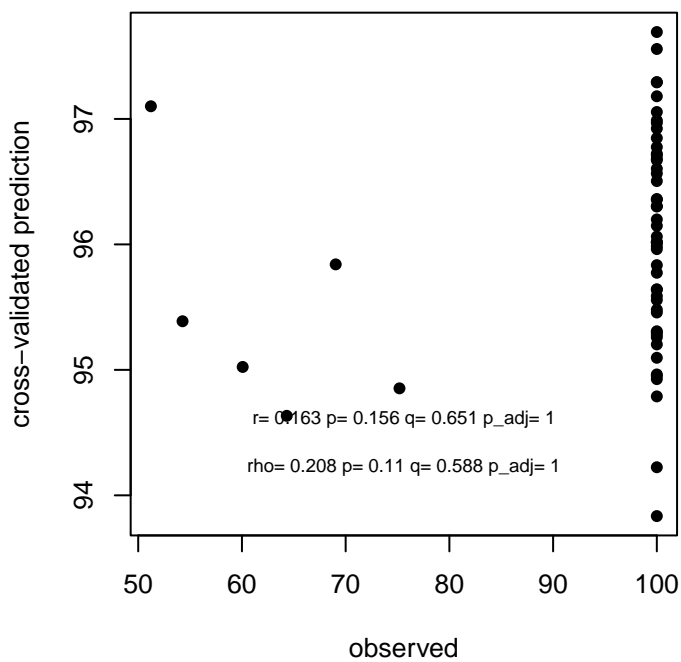

### HUVEC\_48hr\_cytoplasmicintegrity

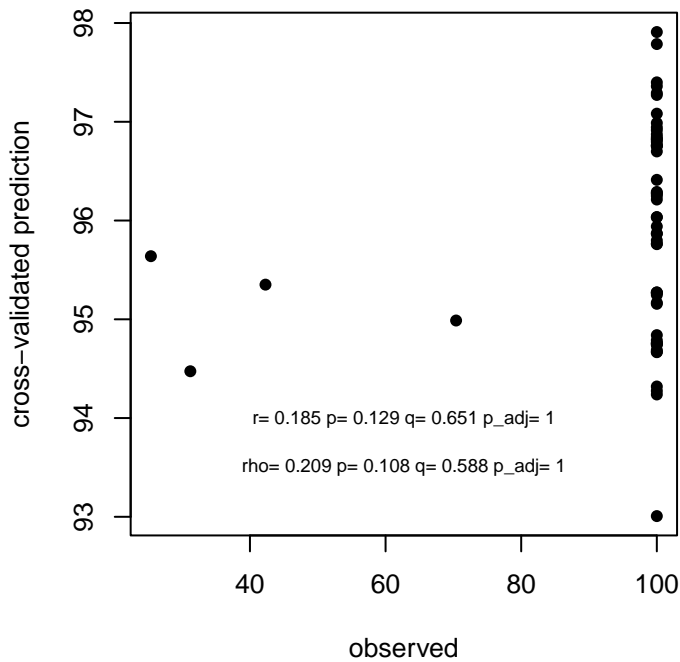

### HUVEC\_48hr\_mitochondrialintegrity

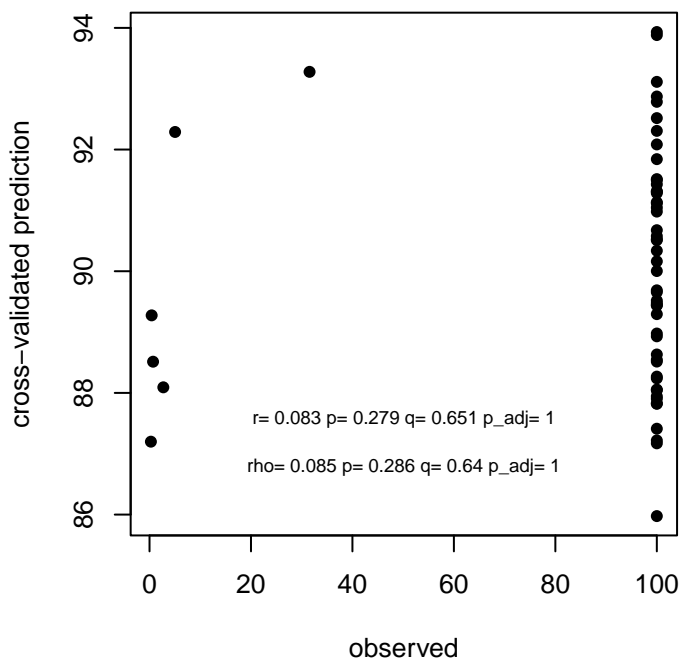

### HUVEC\_48hr\_allnucleimeanarea

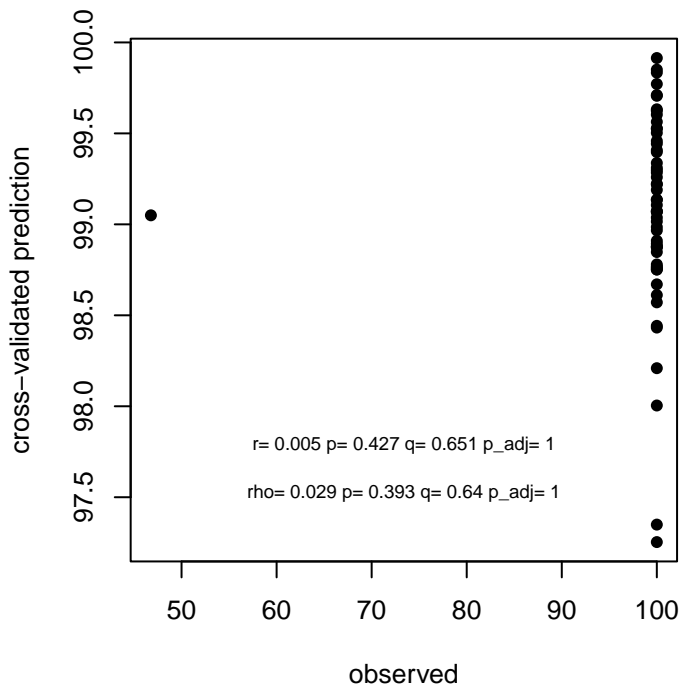

### NEURONS\_72hr\_totalcells

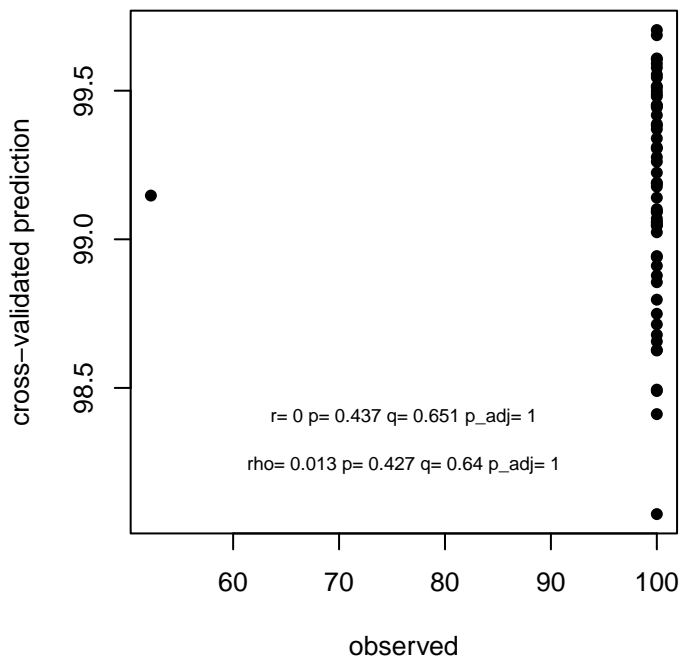

### NEURONS\_72hr\_cytoplasmicintegrity

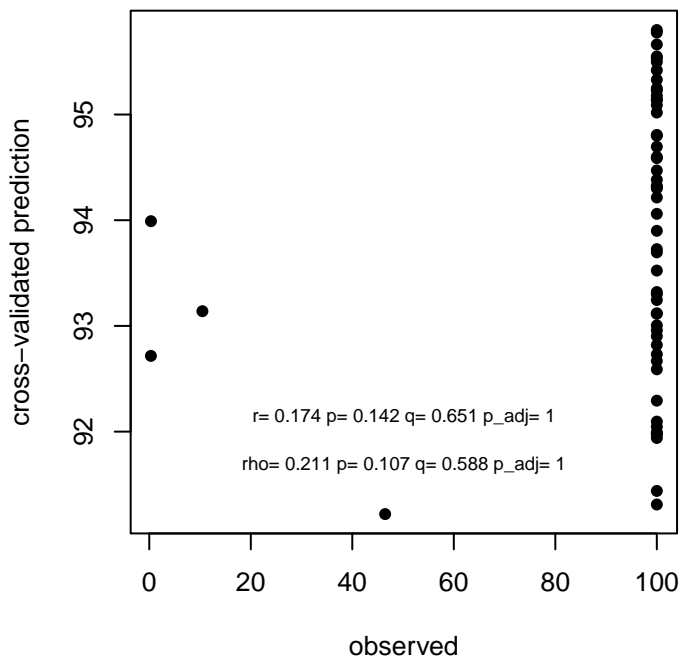

### NEURONS\_72hr\_totaloutgrowth

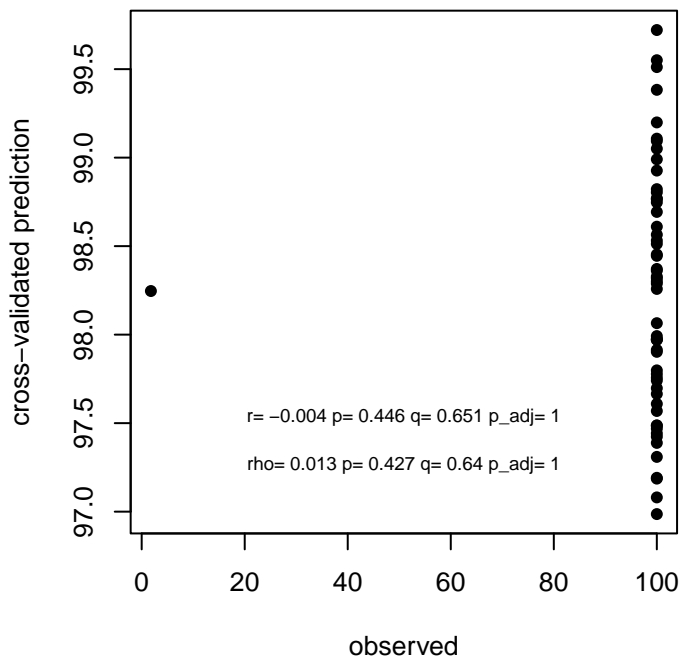

### NEURONS\_72hr\_totalprocess

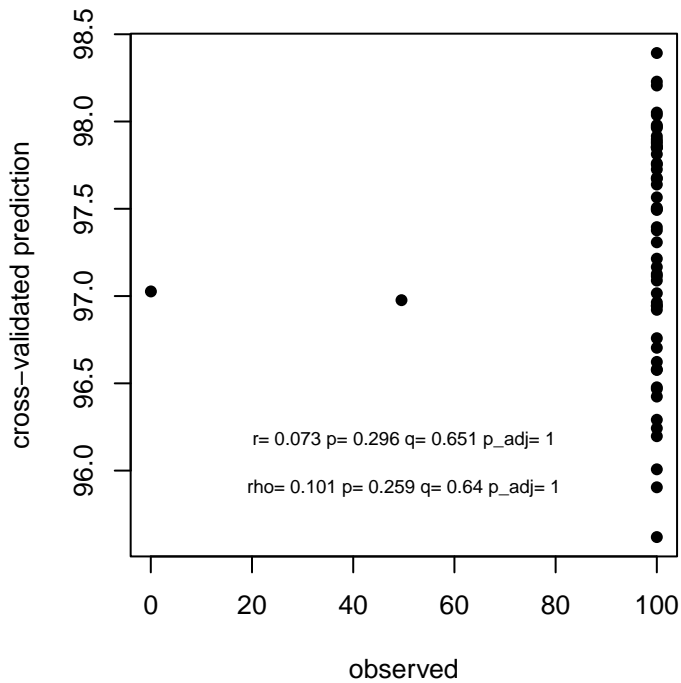

### NEURONS\_72hr\_totalbranches

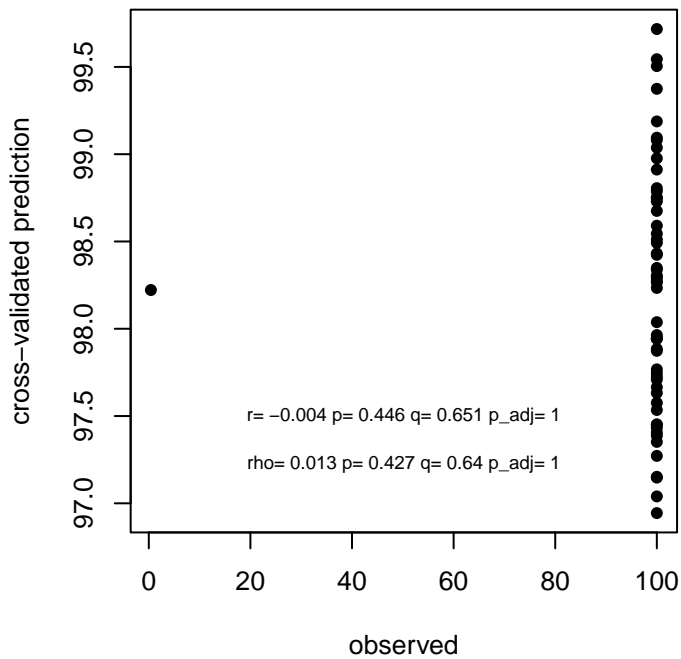

### NEURONS\_72hr\_cellsiwithsignificantgrowth

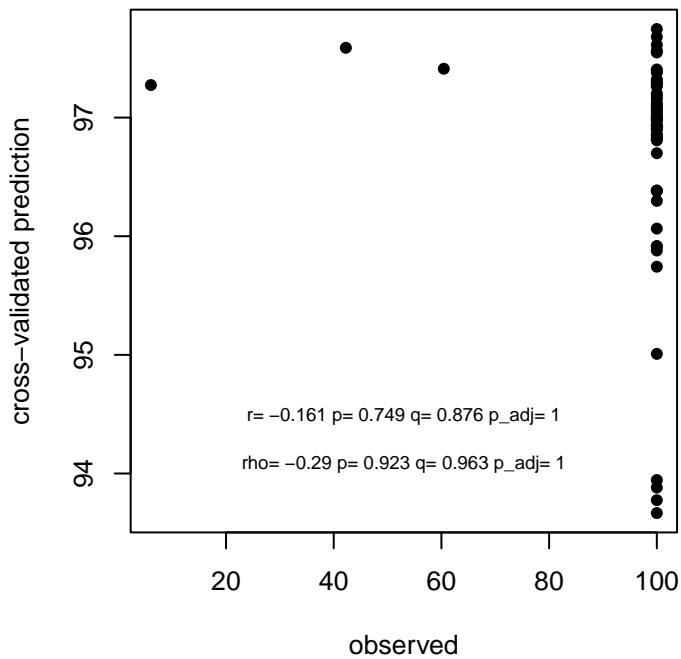

### HEPATOCYTES\_48hr\_totalgranulearea

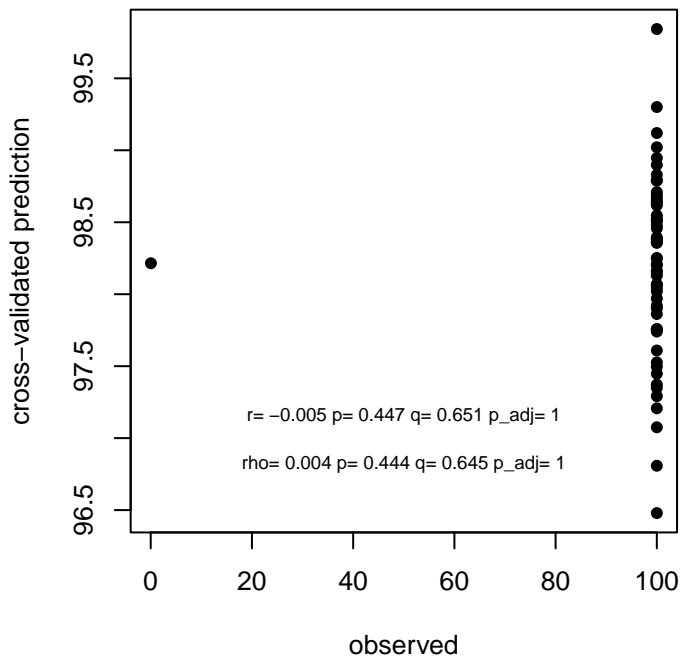

### HEPATOCYTES\_48hr\_granularity

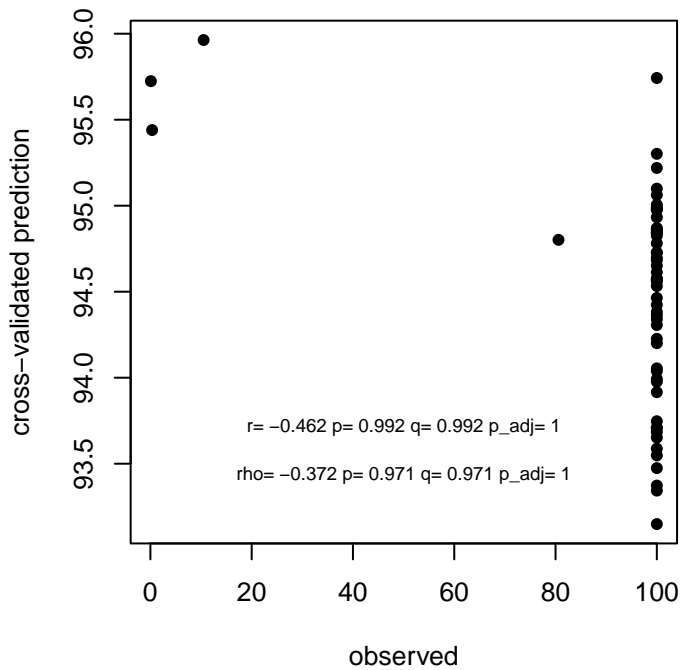

### HEPATOCYTES\_48hr\_totalcells

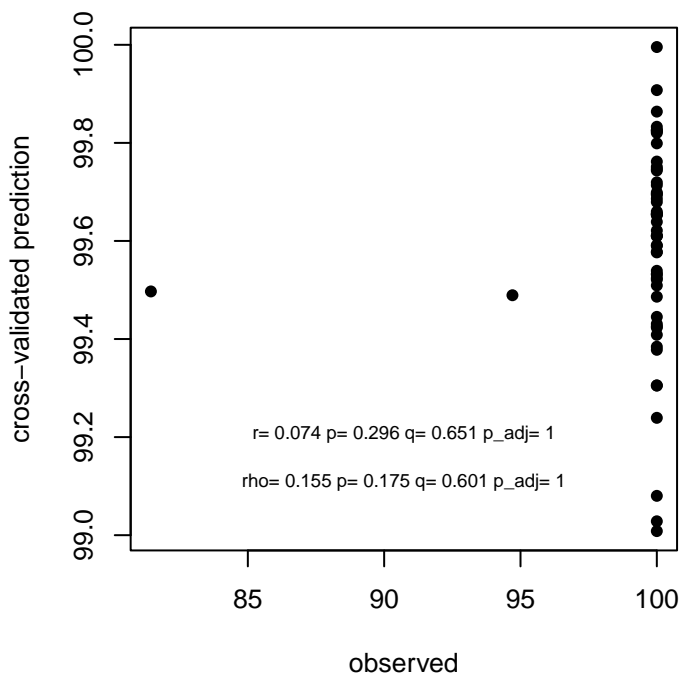

### HEPATOCYTES\_48hr\_allcellsmeanarea

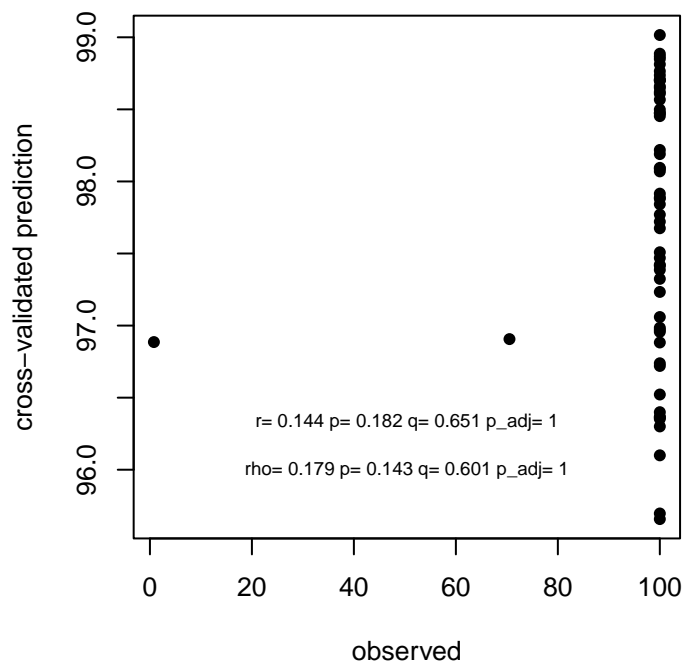

### HEPATOCYTES\_48hr\_cytoplasmicintegrity

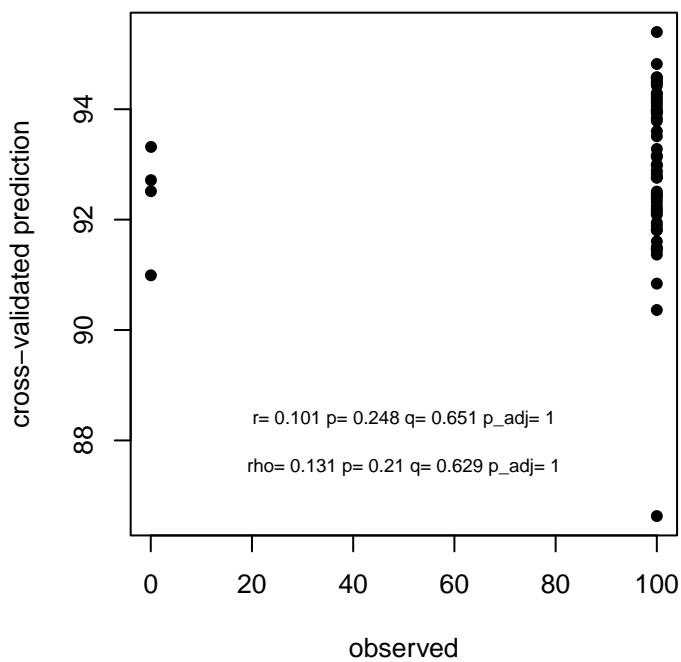

### HEPATOCYTES\_48hr\_mitochondrialintegrity

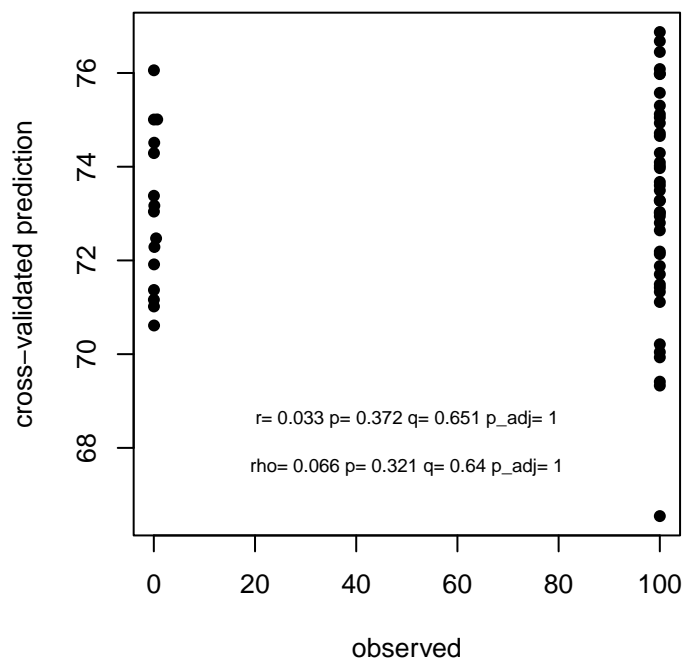



### HEPATOCYTES\_48hr\_mitochondrialintensity

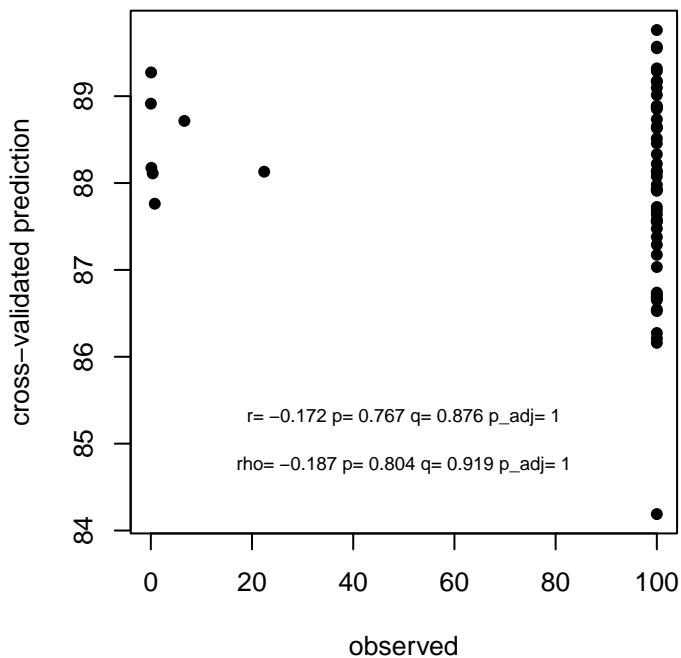

### HEPATOCYTES\_48hr\_nucleiintensity

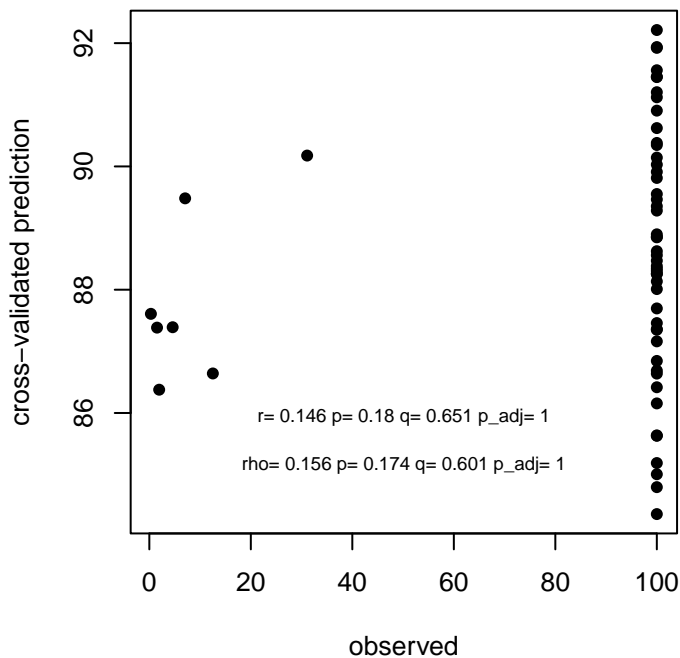

### PHHs\_48hr\_totalgranulearea

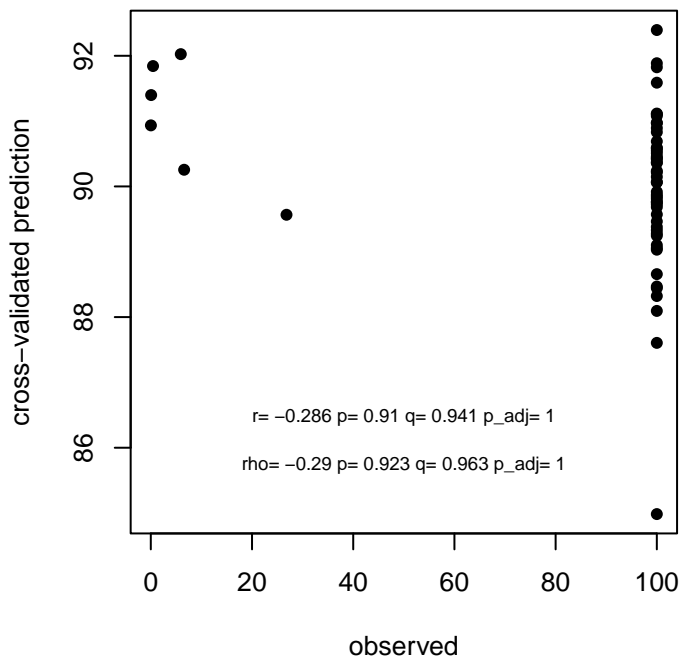

### PHHs\_48hr\_granularity

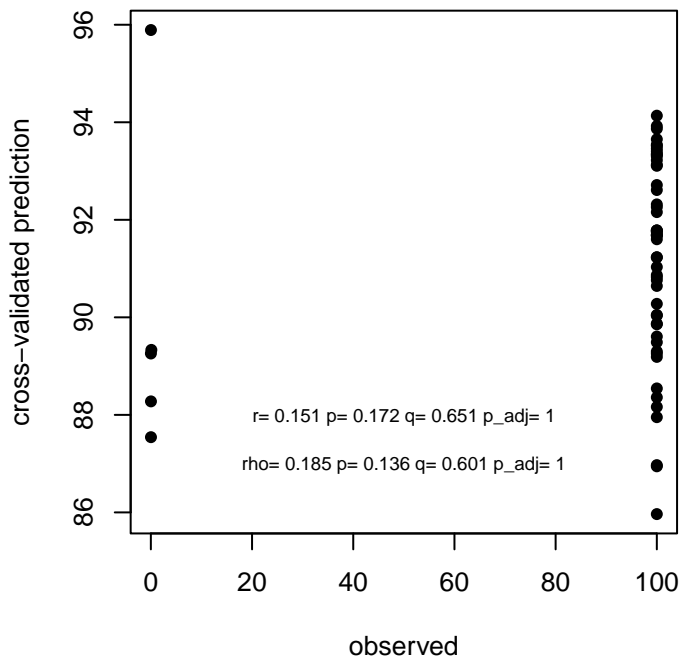

**PHHs\_48hr\_totalcells**

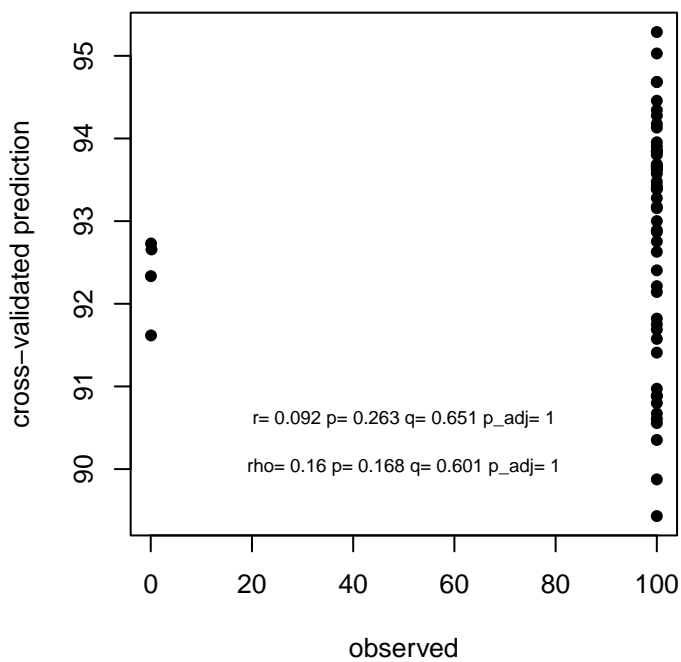

**PHHs\_48hr\_allcellsmeanarea**

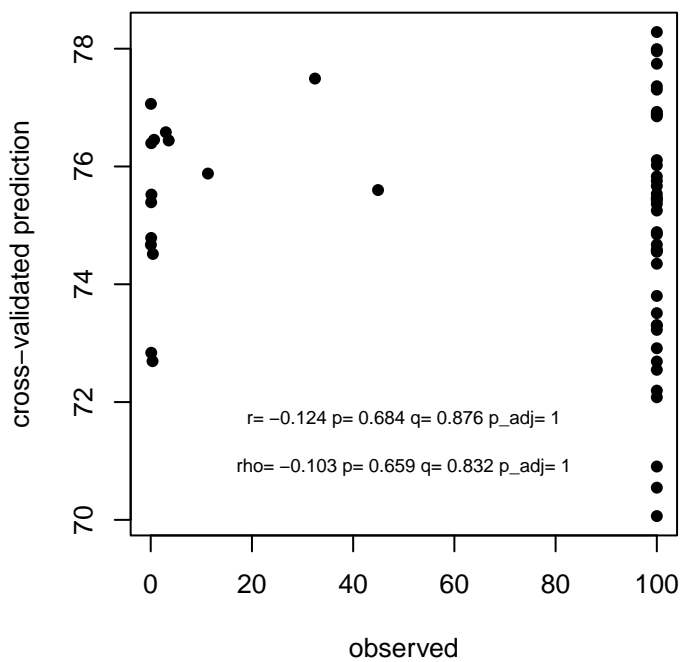

**PHHs\_48hr\_cytoplasmicintegrity**

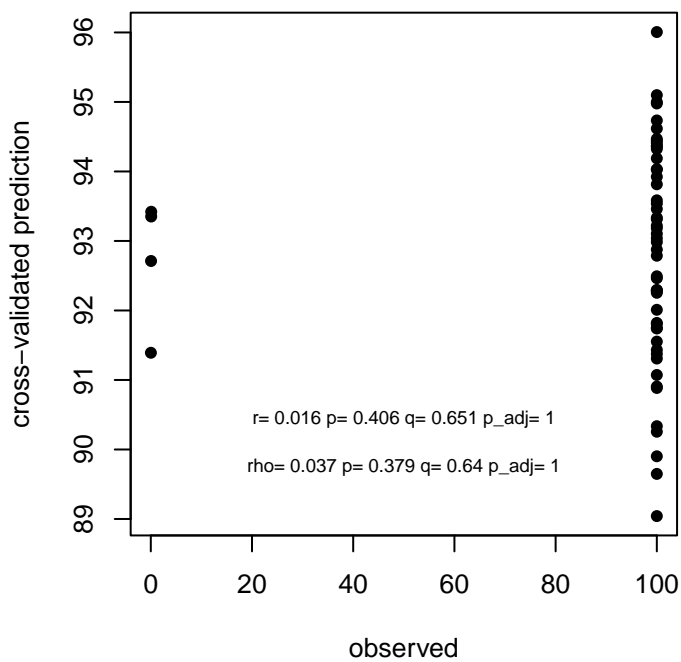

**PHHs\_48hr\_mitochondrialintegrity**

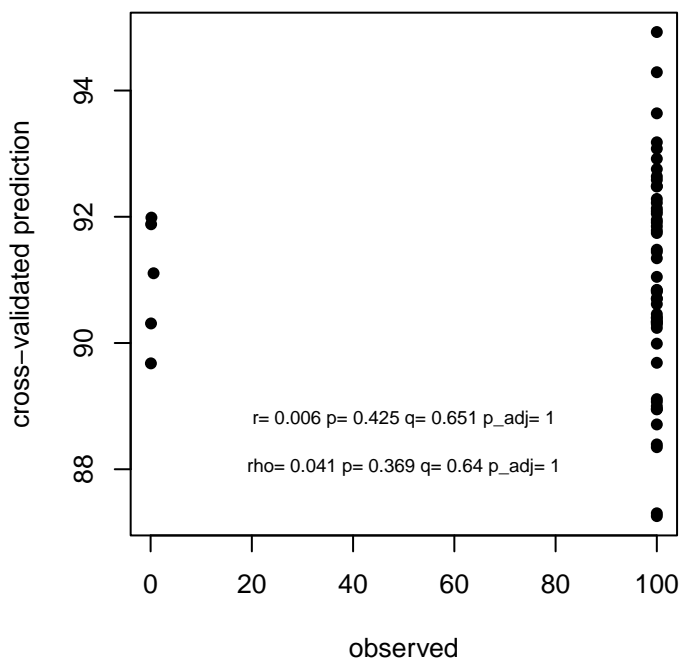

### PHHs\_48hr\_mitochondrialintensity

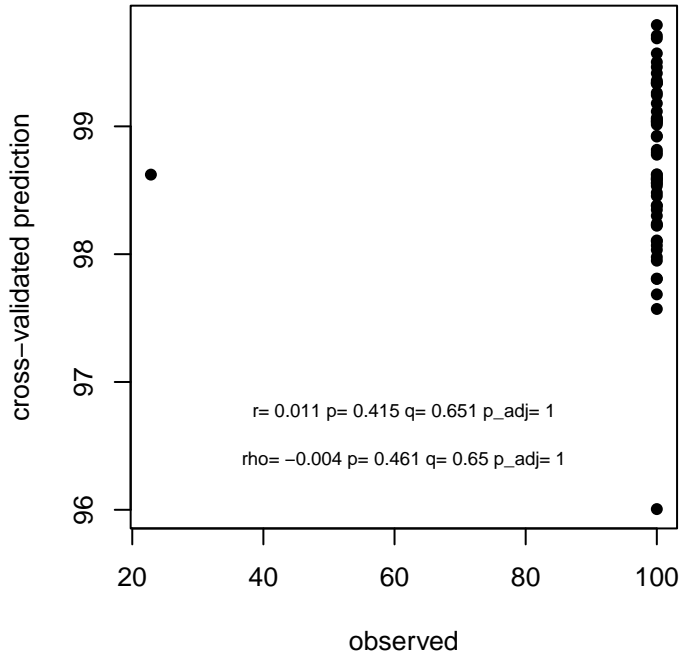

### PHHs\_48hr\_nucleiintensity

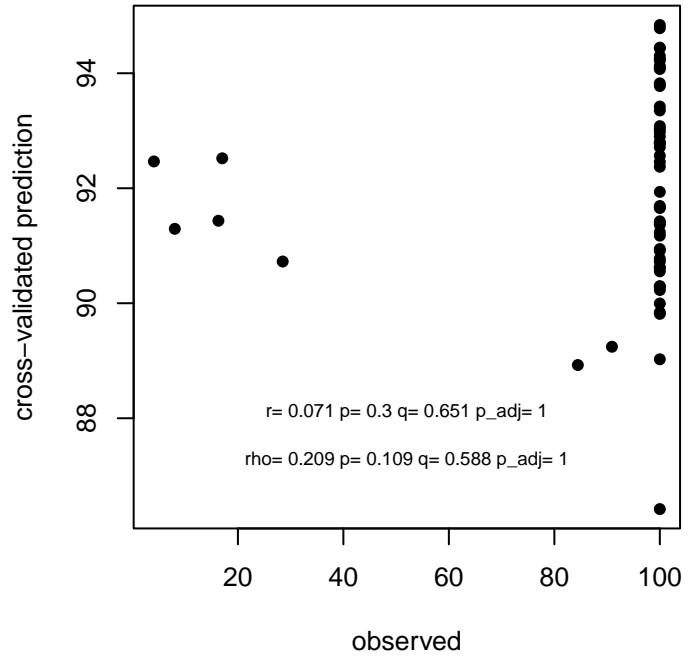

### HepG2\_48hr\_granularity

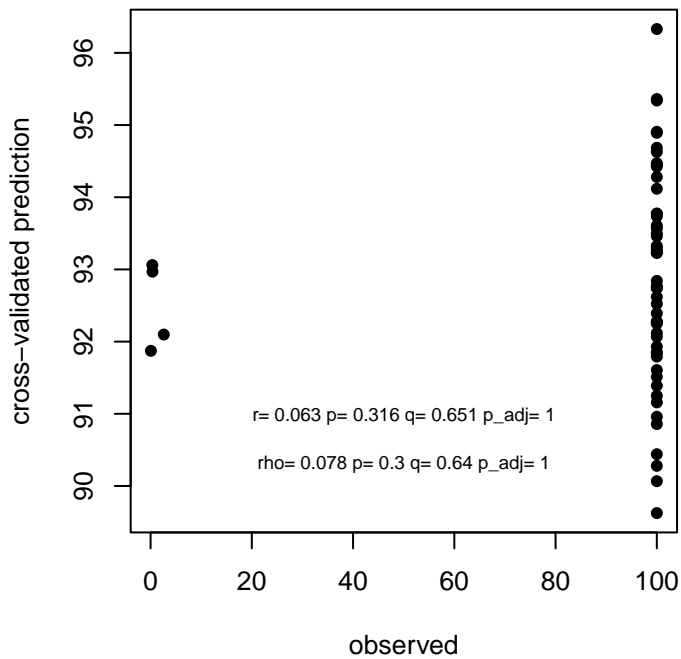

### HepG2\_48hr\_totalcells

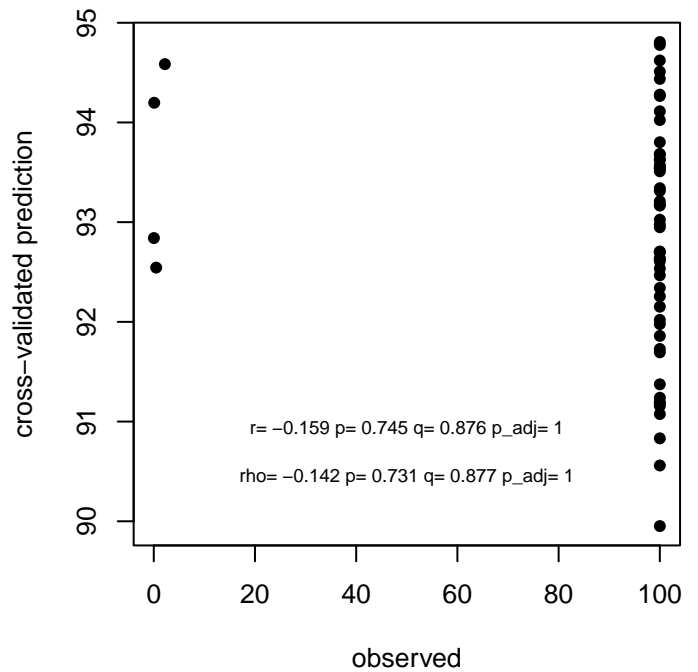

### HepG2\_48hr\_allcellsmeanarea

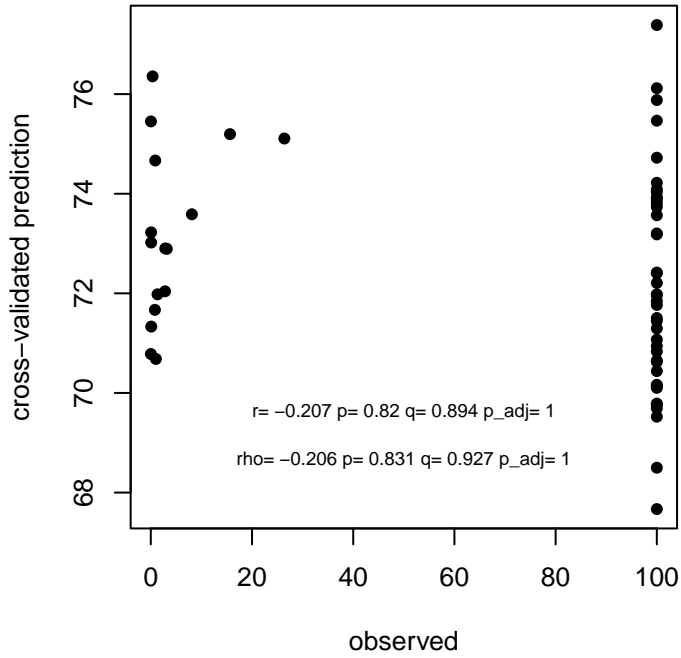

### HepG2\_48hr\_cytoplasmicintegrity

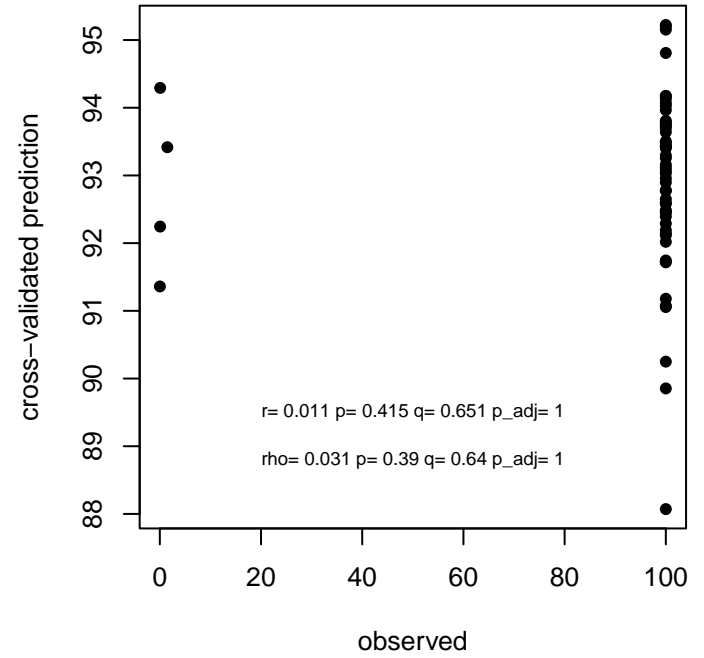

### HepG2\_48hr\_mitochondrialintegrity

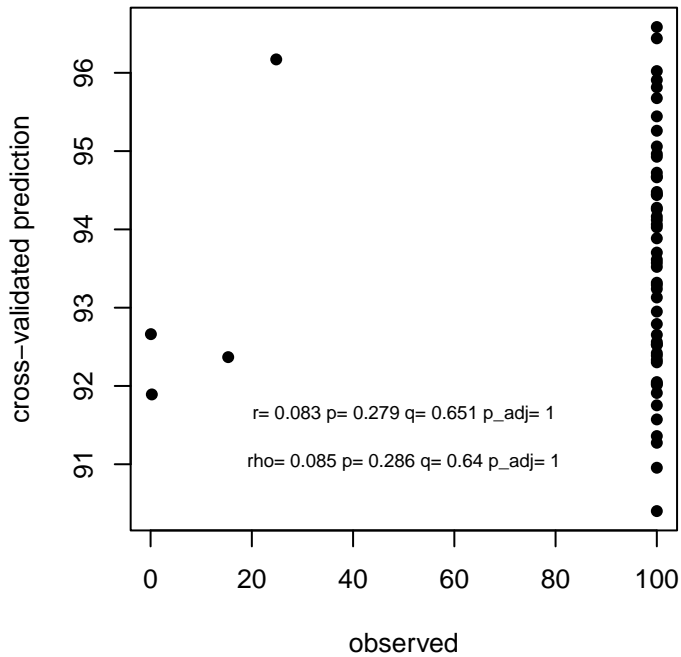

### HepG2\_48hr\_mitochondrialintensity

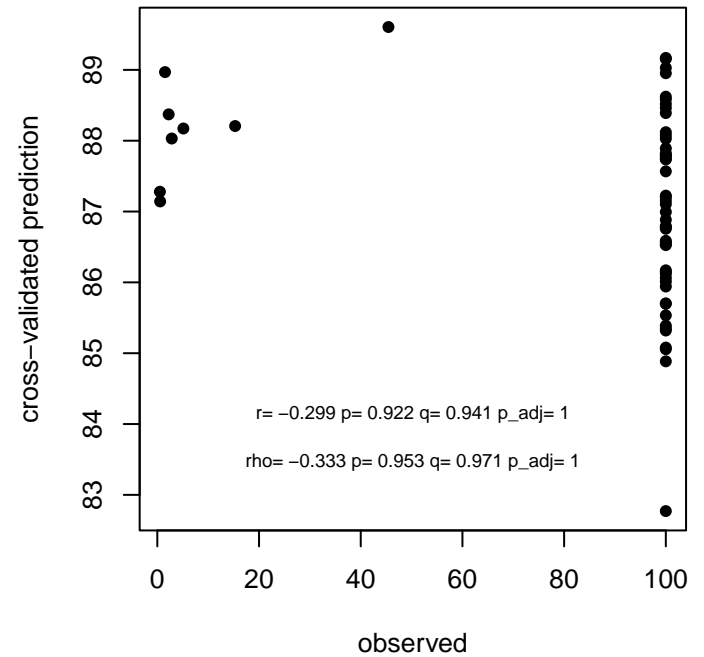

### HepG2\_48hr\_nucleiintensity

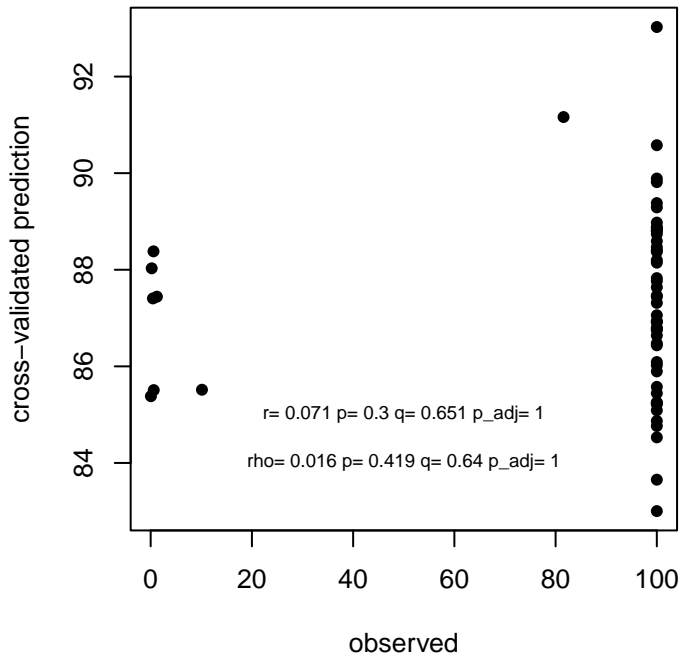

### CARDIO

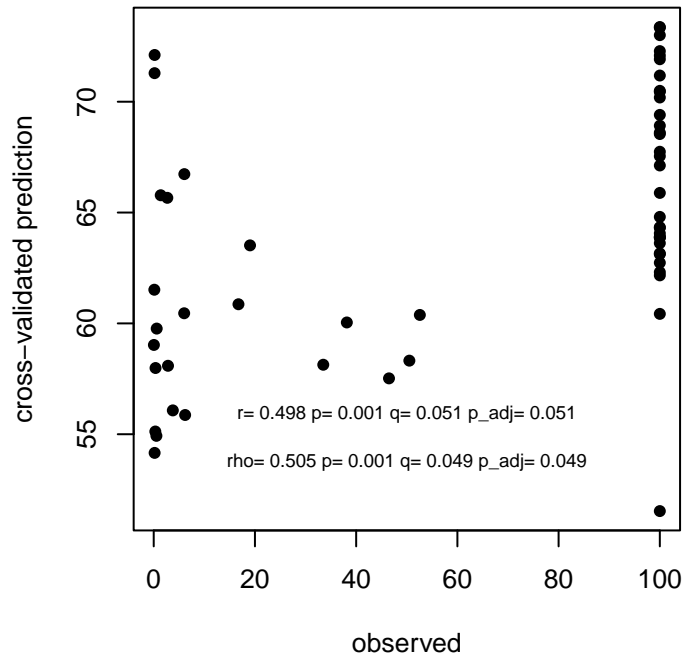

### HEPATOCYTES

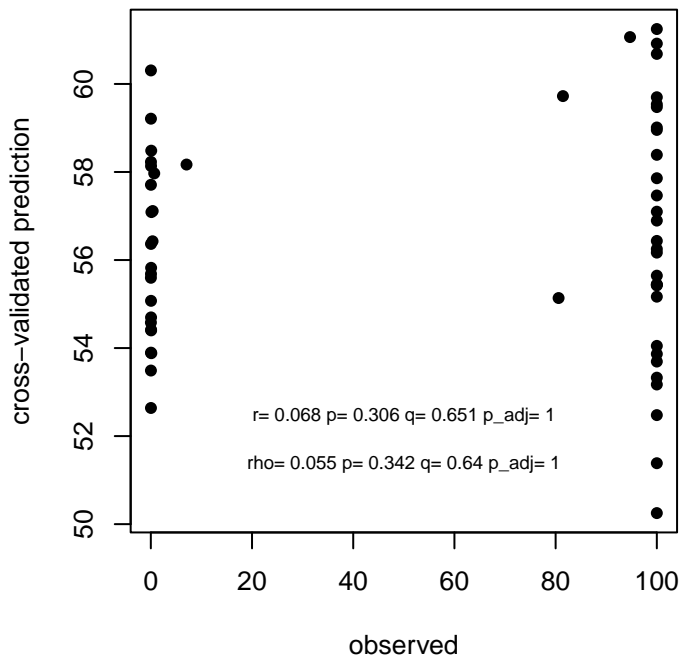

### HepG2

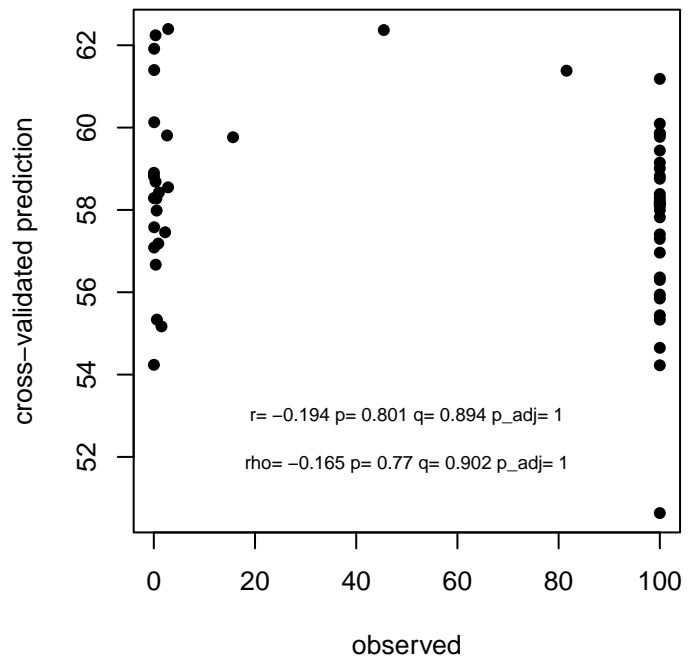

### HUVEC

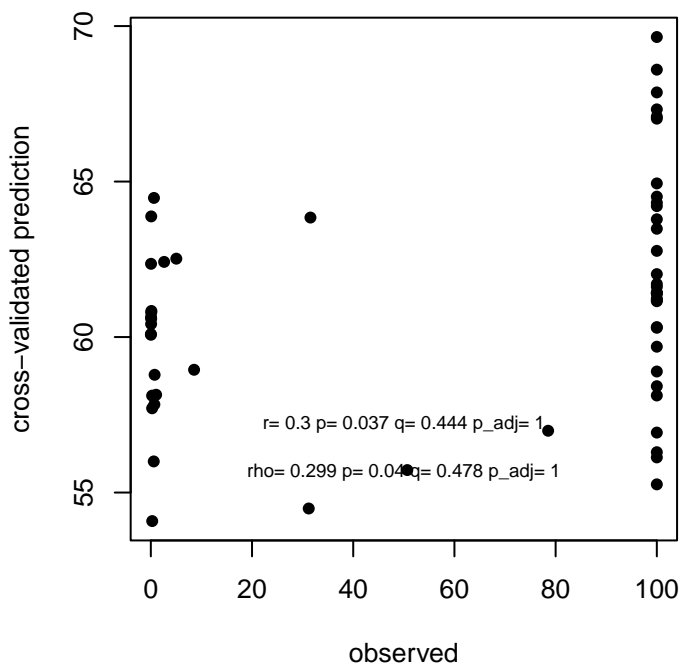

### NEURONS

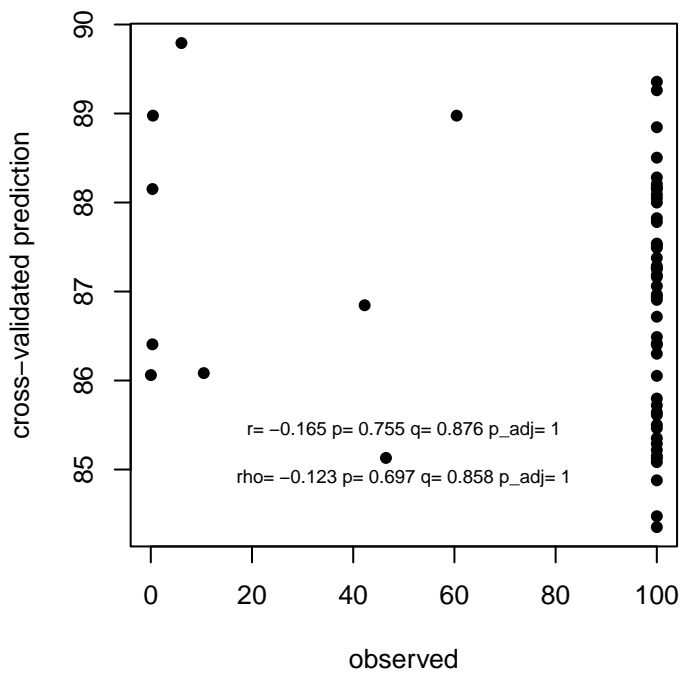

### PHHs

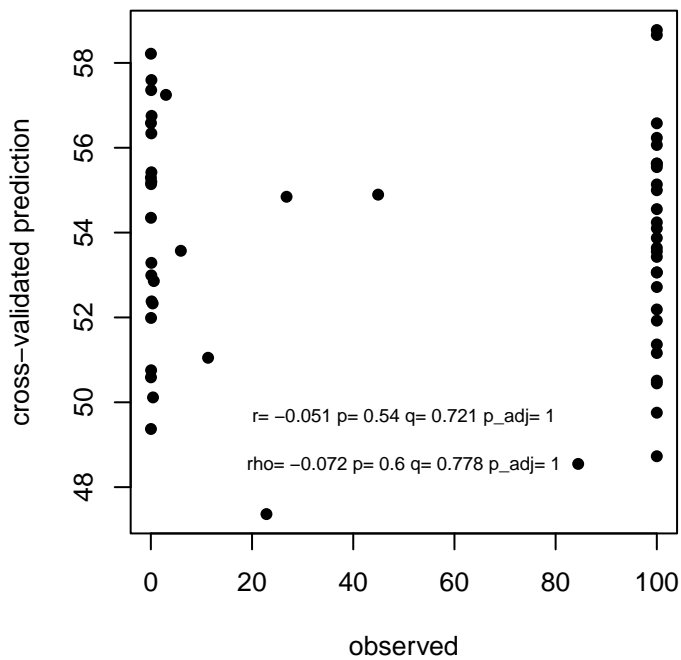

### minPOD

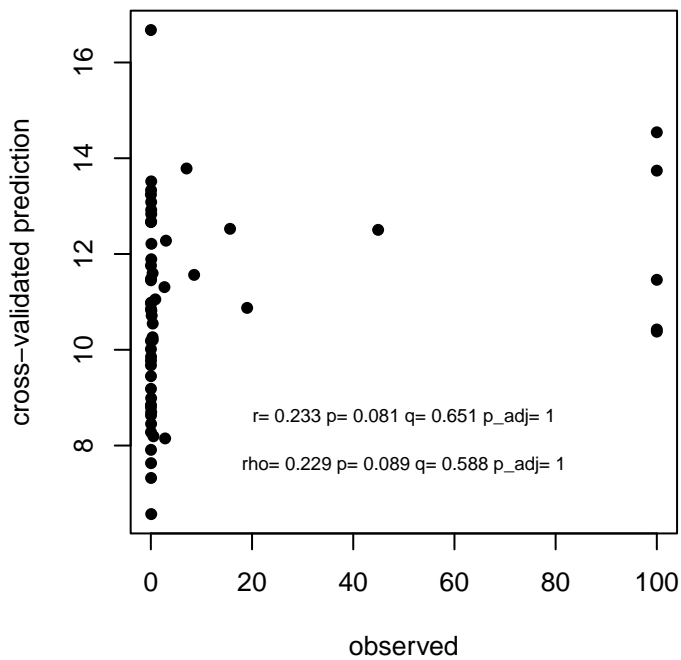

Supplement: NIHMS2005158-supplement-Supplemental_Figure_8.pdf [file NIHMS2005158-supplement-Supplemental_Figure_8.pdf]
