# Supplementary material
Source: PubMed Central journal article supplement (PMC11214689)
Supplement: NIHMS2005158-supplement-Supplemental_Figures_1-6.pdf [file NIHMS2005158-supplement-Supplemental_Figures_1-6.pdf]

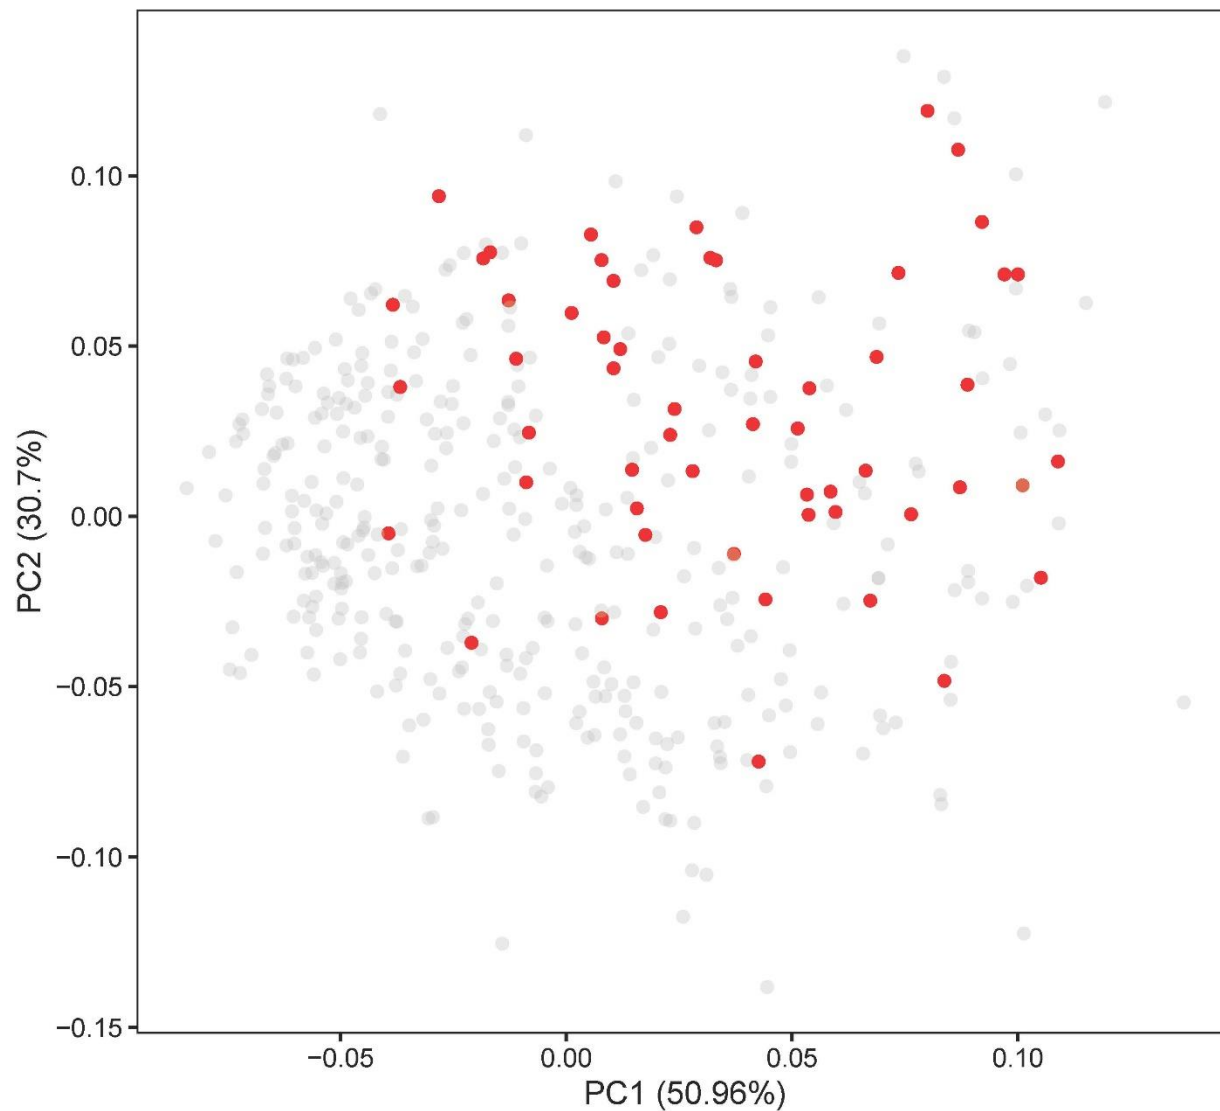

**Figure S1: Principal components analysis of the PFAS tested and the PFAS landscape.** PCA plot was created using physicochemical descriptors, grey dots represent the PFAS landscape and red dots are the PFAS used in this study.



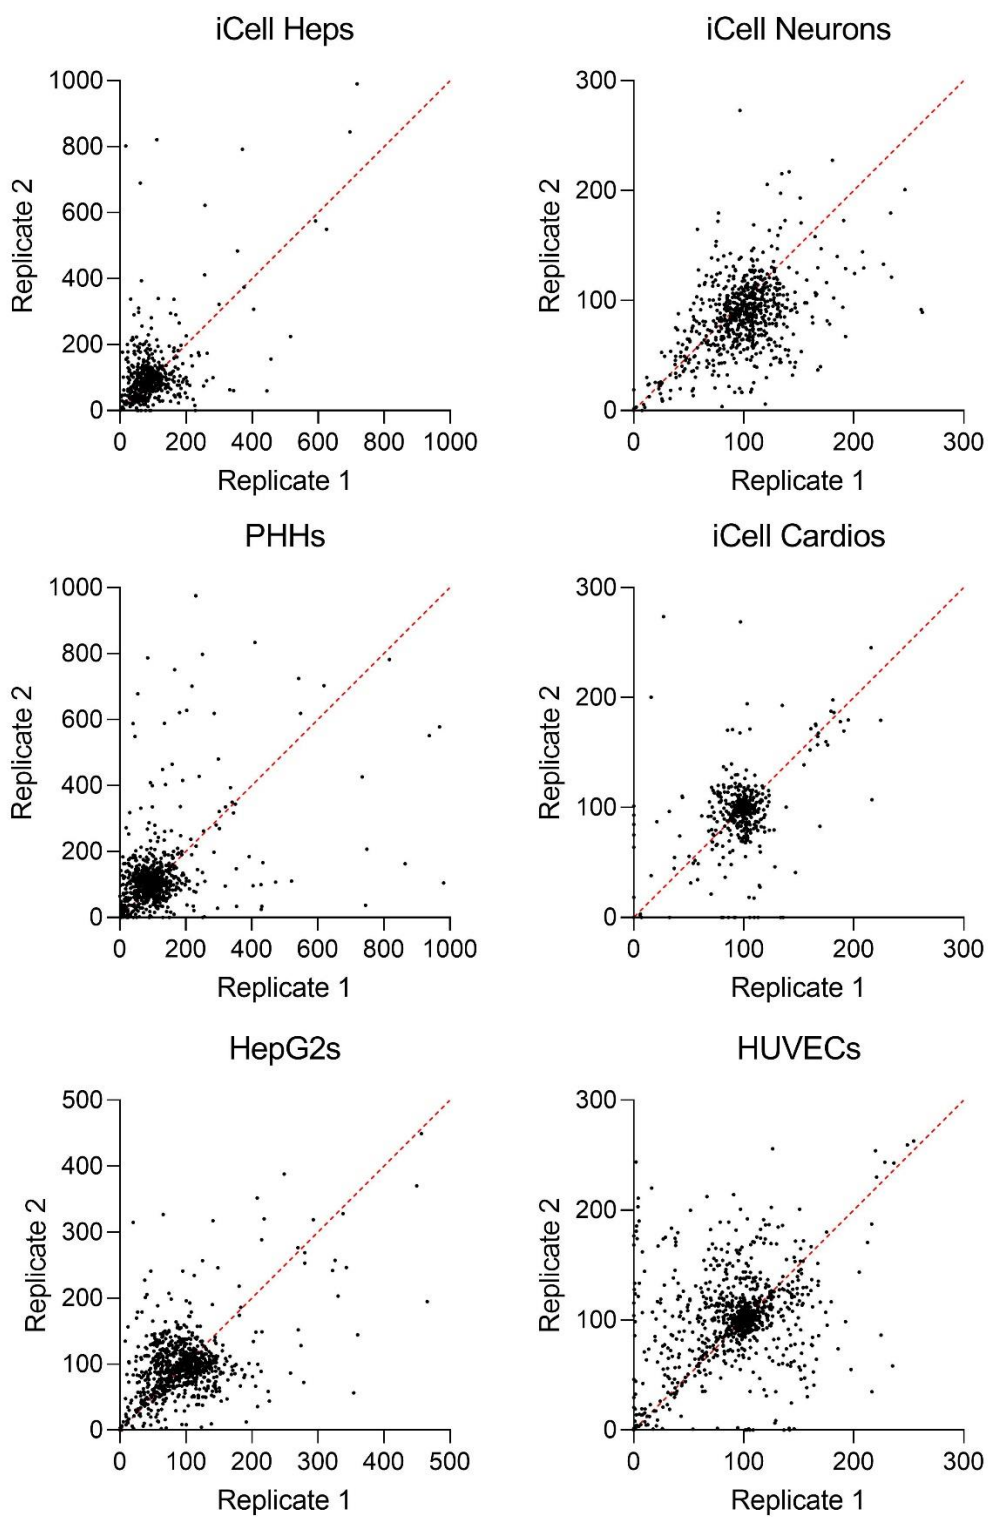

**Figure S4: Cell-type specific quality control for the intraplate replicates.** Intraplate reproducibility by cell type using chemicals and samples that were replicated on a single plate.

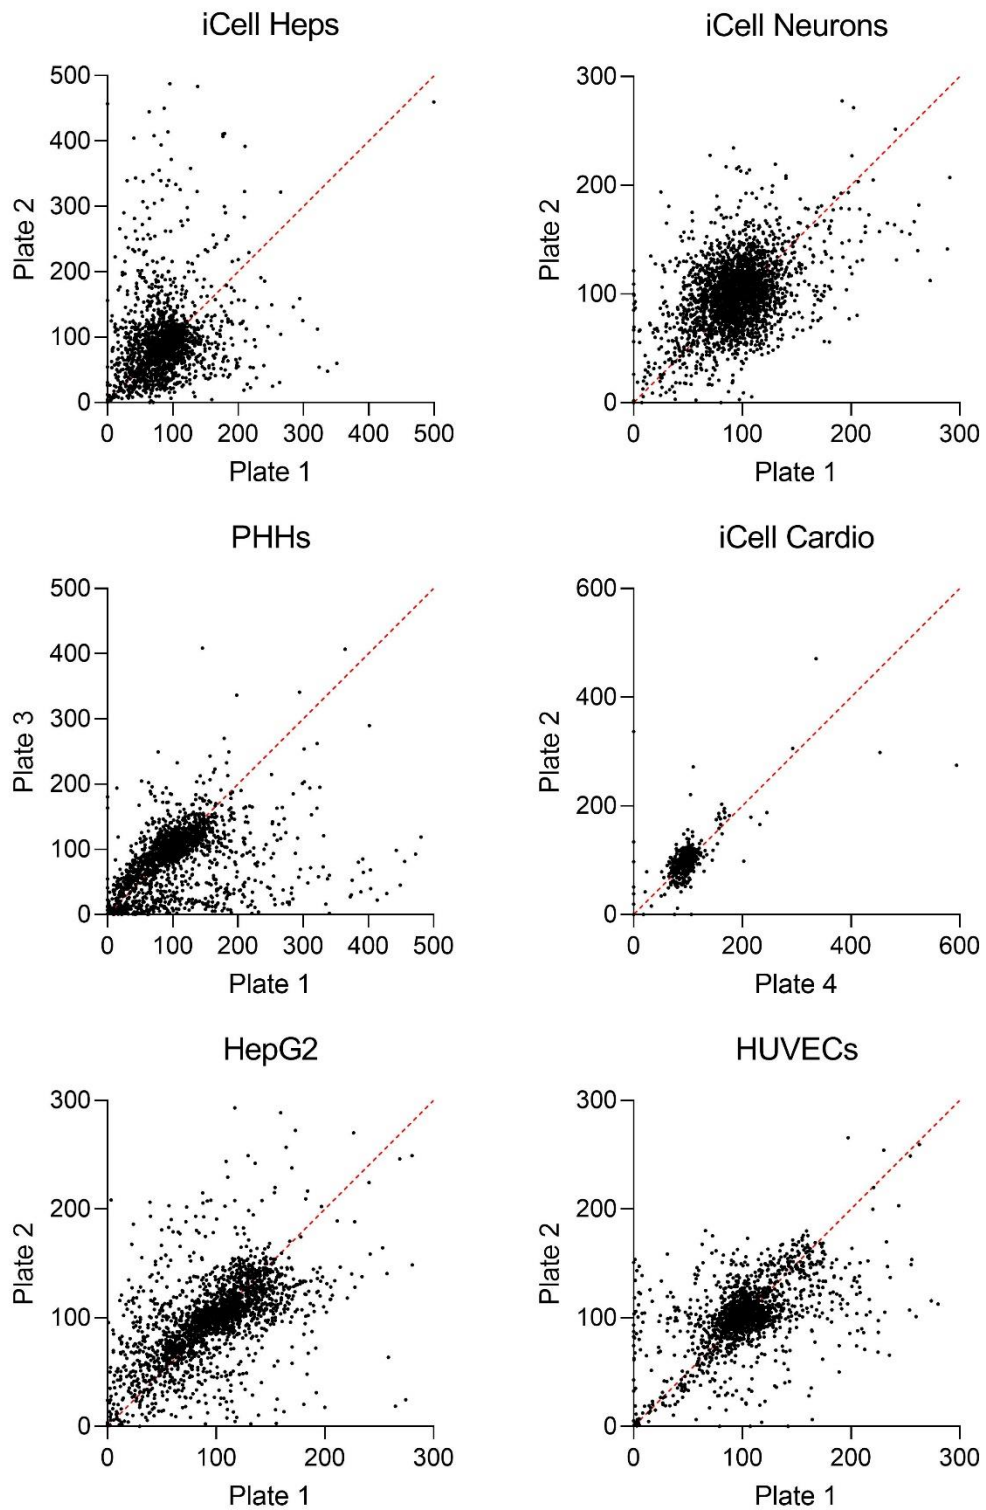

**Figure S5: Cell-type specific quality control for the interplate replicates.** Interplate reproducibility by cell type using the entire plate as replicates.

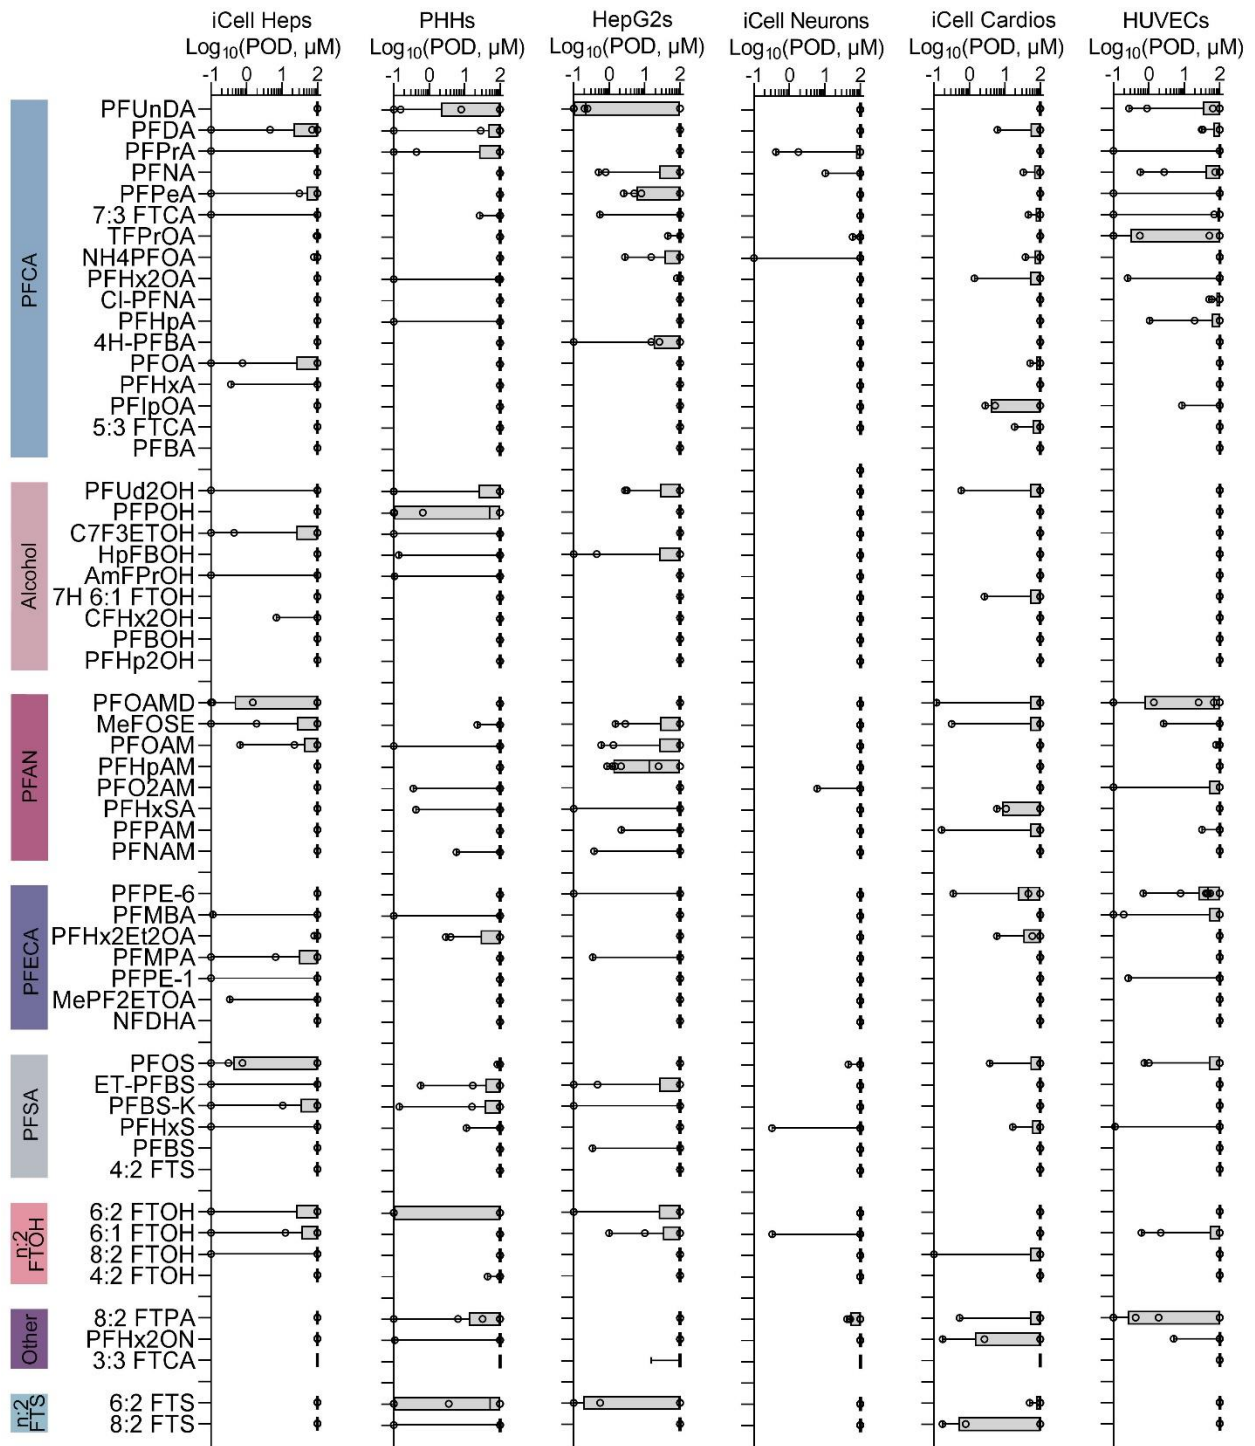

**Figure S6: Chemical-specific PODs across all tested cell types.** Chemicals are arranged by most represented PFAS subclass. Box and whisker plots show the PODs for each phenotype across all cell types.
